# Supplementary material for: Functional exploration of heterotrimeric kinesin-II in IFT and ciliary length control in Chlamydomonas
Source: eLife. 2020 Oct 28;9:e58868. doi: 10.7554/eLife.58868 (PMC7652414; doi:10.7554/eLife.58868)
Supplement: Figure 3—source data 3. [file elife-58868-fig3-data3.xlsx]

## Sheet: Figure 3E
Figure 3E IFT train size (mm)
WT	FLA8/FLA10/KAP	KIF3B'/FLA10/KAP
0.269476	0.250114	0.340091
0.184966	0.158542	0.308428
0.209112	0.175171	0.286105
0.155353	0.243508	0.339863
0.375399	0.407973	0.237585
0.286105	0.338952	0.159453
0.298861	0.248519	0.347608
0.228246	0.313667	0.208884
0.240319	0.145102	0.283371
0.312528	0.148291	0.231891
0.194533	0.188383	0.247153
0.130068	0.253758	0.285421
0.175399	0.353075	0.357631
0.30615	0.238724	0.241913
0.202278	0.282004	0.177904
0.159681	0.154442	0.156264
0.215945	0.121868	0.343963
0.186788	0.25262	0.26492
0.232574	0.200228	0.269476
0.235535	0.196128	0.314578
0.22574	0.248975	0.250797
0.212756	0.2959	0.187927
0.210934	0.196811	0.199544
0.171298	0.132118	0.259225
0.238724	0.266743	0.233485
0.209112	0.232346	0.143508
0.31025	0.294989	0.158542
0.199772	0.253075	0.259453
0.281777	0.182916	0.0938496
0.368109	0.285649	0.245786
0.382005	0.305922	0.216629
0.33508	0.323462	0.378588
0.202506	0.240547	0.234396
0.239408	0.24328	0.190888
0.274715	0.245103	0.25877
0.193622	0.306378	0.214351
0.204784	0.235308	0.248291
0.275626	0.304556	0.196583
0.337813	0.209567	0.468109
0.224829	0.283599	0.24943
0.235991	0.127107	0.200456
0.228929	0.32574	0.351481
0.167426	0.292563	0.183143
0.18041	0.290193	0.279043
0.15877	0.238577	0.327563
0.338041	0.265663	0.287699
0.228702	0.26156	0.154214
0.234169
0.213667
0.237585
0.25672
0.208884
0.221185
0.278588
0.172437
0.360137
0.257859
0.28246
0.355353
0.274032
