# Supplementary material for: Functional exploration of heterotrimeric kinesin-II in IFT and ciliary length control in Chlamydomonas
Source: eLife journal article supplement (doi:10.7554/elife.58868), 2020-10-28
Supplement: supp [file Figure 1C statistical data.xlsx]

## Sheet: Figure 1C
Velocities (mm/s)
WT	FLA8/FLA8'	FLA10/FLA10'
1.23466	1.54321	2.05754
1.58721	1.52855	1.76365
1.72848	1.54321	1.76365
1.78322	1.78322	1.8519
1.74298	2.05754	1.92909
1.81072	1.6203	2.46915
1.72848	1.71245	1.8519
1.38894	1.50886	1.8519
1.8519	1.66657	1.9079
1.97525	1.6703	1.97525
1.68346	1.68939	1.78322
1.74892	1.9547	2.05754
1.44024	1.74892	1.68346
1.23466	1.54321	1.8519
1.50886	1.60496	1.54321
1.64617	1.63586	1.8519
1.76365	1.5594	1.78322
1.60496	1.50886	1.80434
2.0062	1.61022	1.94013
1.52505	1.5152	2.22223
1.23466	1.78322	1.92048
1.35796	1.49902	1.8519
1.72848	1.40137	1.68939
1.69751	1.27319	1.97525
1.57123	1.30717	1.68346
1.8519	1.54321	1.79576
1.64617	2.05754	1.8519
1.23466	1.8519	1.97525
1.82239	1.67556	1.79576
1.94013	1.62446	1.94013
1.23466	1.41098	2.13247
1.8993	1.57123	1.8519
1.8519	1.72848	2.16044
1.05818	1.9079	1.64617
1.23466	1.52855	1.72848
1.8929	1.52855	2.02013
1.35796	1.58721	2.16044
1.69751	1.60496	1.72848
1.45902	1.42954	1.54321
1.9079	1.70937	1.97525
1.52505	1.11116	1.72848
1.38894	1.71772	1.92048
1.8519	1.46601	1.94013
1.97525	1.64617	1.8519
1.61438	1.64617	1.56378
1.51958	1.41098	1.8519
1.70937	1.46317	2.29282
1.64617	1.70937	1.64617
1.60496	1.57123	1.8519
1.41098	1.50886	1.8519
1.38261	1.46601	1.54321
1.57123	1.70937	1.54321
1.8519	1.54321	1.94013
1.76365	1.54321	1.8519
1.49902	1.8519	2.22223
	1.44024	2.34569
	1.6703
	1.74892
	1.52505
	1.33746
	1.54321
	1.42954
	1.3717
	1.80434
	1.49902
	1.74892
	1.9547
	1.80434
	1.54321
	1.64617
	1.41098
	1.79576
	1.56378
	1.68346
	1.54321
	1.33746
	1.61438
	1.47344
	1.64617
	1.42451
	1.45902
	1.41098
	1.78322
