# Supplementary material for: Functional exploration of heterotrimeric kinesin-II in IFT and ciliary length control in Chlamydomonas
Source: eLife journal article supplement (doi:10.7554/elife.58868), 2020-10-28
Supplement: supp [file Figure 1E_velocity.xlsx]

## Sheet: Figure 1E
Anterograde velocities (mm/s)		Retrograde velocities (mm/s)
con	FLA10/FLA10'	con	FLA10/FLA10'
2.21014	2.43762	2.71833	3.57515
2.36362	2.40008	3.1001	3.15731
1.95009	2.70837	3.42729	3.57515
2.07985	2.33991	4.28982	3.15731
2.29427	2.88881	3.3221	2.97154
2.33991	2.60003	3.29986	4.33329
2.07985	2.27518	3.42729	3.34291
1.8571	2.60003	4.45697	4.11669
2.16669	2.76242	3.57515	3.19095
2.13562	2.49999	2.94193	2.60003
2.60003	2.41425	3.31492	4.76652
1.8571	2.60003	3.35834	3.89992
2.42664	2.85996	3.46682	3.89992
1.99344	2.60003	3.70498	2.81651
1.67136	2.60003	3.68332	4.33329
2.24548	2.74428	3.34291	3.41255
2.41425	2.43762	3.89992	4.11669
2.27518	2.60003	3.46682	3.89992
2.00896	2.60003	3.34291	4.22487
1.95009	2.78555	4.11669	4.16001
2.22851	2.81651	3.49991	2.78555
2.21014	2.27518	3.61118	4.93987
2.16669	2.73006	3.89992	4.76652
2.16669	2.92517	3.57515	2.97154
2.19389	2.95441	3.61118	4.27157
2.00896	2.73006	2.92517	3.25004
1.80008	2.92517	3.89992	4.98322
2.09997	2.78555	3.68332	4.27157
2.60003	2.29993	2.81651	3.41255
2.11267	2.60003	3.41255	3.73748
2.16669	2.60003	3.35834	2.83645
1.99344	2.60003	3.73748	3.25004
2.35618	2.60003	3.03328	2.81651
1.87788	2.33991	4.11669	4.04433
1.75505	2.36362	3.89992	2.60003
1.8571	2.33991	3.37987	2.76242
2.16669	2.60003	3.15731	4.27157
1.68226	2.21014	4.0625	4.55013
2.07985	2.60003	4.11669	3.5287
2.21014	2.76242	3.89992	3.89992
1.87788	2.45569	4.41998	3.34291
2.03117	2.81651	4.41998	3.15731
1.86872	2.60003	3.25004	2.60003
2.36362	2.76242	3.75555	2.97154
2.00896	2.60003	3.73748	3.19095
2.21014	2.49184	3.64003	4.55013
1.84161	2.36362		3.71436
1.95009	2.33991		3.68332
2.24548	2.60003		3.5287
2.03117	2.60003		3.42729
2.16669	2.81651		3.73748
2.27518	2.60003		3.71436
1.99344	2.41425		3.08759
	2.41425		3.12012
	2.85996		3.5287
	2.76242		4.08577
	2.83645		3.34291
	2.41425		4.08577
	2.74428		3.5287
	2.78555		3.25004
	2.60003		3.73748
	2.49184		3.64003
	2.60003		3.46682
	2.60003		2.85996
	2.46987		2.60003
	2.60003		3.25004
	2.97154		3.15731
	2.35618		3.25004
	2.45569		3.89992
	2.60003		2.88881
	2.74428
	2.95441
	2.48192
