# Supplementary material for: Functional exploration of heterotrimeric kinesin-II in IFT and ciliary length control in Chlamydomonas
Source: eLife journal article supplement (doi:10.7554/elife.58868), 2020-10-28
Supplement: supp [file Figure 2B.xlsx]

## Sheet: Figure 2B
Motor velocities (mm/s)
CrKinesin-II	KIF3A'/FLA8/KAP	KIF3B'/FLA10/KAP	KIF3A'/KIF3B'/KAP	HsKinesin-II
1.94013	0.523697	0.644201	0.27003	0.331692
1.34182	0.470389	0.617196	0.262701	0.308621
1.50886	0.533843	0.740821	0.279516	0.331261
1.50886	0.508372	0.694338	0.298057	0.197605
1.54321	0.474921	0.544637	0.352825	0.291158
1.69751	0.477942	0.557591	0.308621	0.30474
1.72848	0.584799	0.705362	0.301075	0.349374
1.8993	0.524776	0.454853	0.314658	0.555648
1.81557	0.454853	0.561262	0.316599	0.823029
1.64617	0.485063	0.540103	0.315305	0.333633
1.97525	0.445791	0.488732	0.333633	0.417098
1.6203	0.463052	0.572058	0.361235	0.382586
1.94013	0.532116	0.488732	0.383234	0.508372
2.16044	0.533843	0.895129	0.287061	0.273049
1.76365	0.519812	0.823029	0.348296	0.432199
2.05754	0.490674	0.823029	0.348943	0.264641
1.57123	0.501465	0.576161	0.279516	0.29396
1.60496	0.548739	0.526503	0.308621	0.308621
1.56378	0.282103	0.561262	0.331261	0.363176
1.69751	0.4801	0.709902	0.336652	0.4801
1.70937	0.499738	0.543126	0.295254	1.04472
1.8519	0.487437	0.320049	0.314874	0.726117
1.78322	0.561262	0.454853	0.331261	0.449028
1.87879	0.429395	0.2017	0.298057	0.216788
2.18421	0.546796	0.254725	0.334496	0.454853
2.30084	0.395096	0.347218	0.289433	0.508372
2.15045	0.511825	0.185967	0.286199	0.658462
2.05754	0.476215	0.186614	0.319186	0.360157
2.05754	0.436514	0.239636	0.32932	0.198036
1.8843	0.490243	0.418177	0.308621	0.323283
1.60496	0.449028	0.166571	0.346571	0.379783
1.5594	0.450322	0.382155	0.348943	0.432199
1.30325	0.46521	0.71682	0.336652	0.382155
1.64617	0.39143	0.844675	0.359079
1.50886	0.456148	0.352825	0.315736
1.59773	0.488732	0.662999	0.334711
1.8519	0.493911	0.157519	0.308621
1.76365	0.486358		0.277791
2.05754	0.563637		0.281241
1.92048	0.529094		0.296332
1.88827	0.529094
2.01438	0.499738
1.94013	0.493911
2.16044	0.617196
2.31489	0.562557
1.8519	0.580912
2.05754	0.518948
1.8519	0.522402
	0.512473
	0.51312
