# Supplementary material for: Functional exploration of heterotrimeric kinesin-II in IFT and ciliary length control in Chlamydomonas
Source: eLife journal article supplement (doi:10.7554/elife.58868), 2020-10-28
Supplement: supp [file Figure 2D ciliary length.xlsx]

## Sheet: Figure 2D
Ciliary length (mm)
WT	fla8::FLA8-YFP-7#	fla8::KIF3B'-YFP-RY1#	fla8::KIF3B'-YFP-RY5#	fla8::FLA8-HA-8H2#	fla8::KIF3B'-HA-RH4#	fla8::KIF3B'-HA-RH19#
12.3338	14.6265	9.72682	9.79581	12.8621	10.304	10.3567
14.2249	14.6714	10.371	10.6889	12.911	10.4978	10.2873
13.6249	13.4451	10.24	11.3102	14.3013	10.4857	10.1695
12.5819	13.2482	10.2369	9.6807	13.0152	10.1354	10.6105
12.0203	13.9222	9.34271	10.5326	13.4106	9.6245	12.0889
13.2621	11.6765	9.96713	10.4497	10.3404	10.6753	11.3462
13.9083	13.4955	9.72101	8.34348	12.8195	9.74155	9.67527
13.3028	9.76171	11.7276	9.03108	10.5892	9.22372	10.8137
11.9826	12.8148	9.86054	10.6644	13.928	9.47139	11.6206
12.0218	9.04348	9.0772	9.57527	12.8846	8.72294	10.4594
12.0152	11.6245	10.633	10.0384	13.5361	10.2342	10.4098
11.4272	13.1427	14.0067	11.083	13.1028	10.1001	9.72217
12.3683	12.573	10.9361	11.4578	12.7943	9.86636	10.2888
12.1009	11.3478	10.5532	10.4346	11.3571	10.9319	10.7974
10.6815	14.1885	9.18883	11.0381	13.292	11.1261	11.4012
12.4641	10.8764	9.46984	12.473	11.7354	10.1578	11.4644
12.4454	13.011	11.6923	10.8613	12.3602	11.1865	10.6361
10.0912	12.3648	8.73999	9.34077	14.0966	10.7885	11.9404
11.9768	14.4803	9.34891	12.1621	10.6524	10.9474	10.6044
12.2916	11.4939	11.5462	11.3799	13.9854	13.2552	10.9803
12.1458	13.3734	10.1931	10.0171	13.0354	10.554	8.92178
13.5396	11.147	9.80395	11.2578	10.5051	9.27333	9.41868
12.8765	13.4365	10.1105	9.33457	11.8966	11.9966	11.6706
11.5621	12.3416	8.84542	9.81481	15.19	9.82023	10.004
12.1555	11.3923	10.5524	9.25356	13.4005	10.99	10.7536
11.7264	12.5722	11.6388	9.96907	13.4059	12.0571	12.2772
11.7365	12.8485	10.2606	10.5245	12.0392	11.9644	11.1889
12.1358	10.666	10.4543	10.3307	10.8885	9.75047	9.86791
13.8989	13.2482	9.20627	10.8012	11.2218	10.3222	8.46518
12.0838	11.7544	9.88186	11.6172	13.4718	12.3873	10.5288
13.2369	11.3311	10.8846	11.114	9.93923	11.5877	10.6691
12.7699	12.8547	10.1962	9.78264	14.3315	11.4102	10.8051
13.0051	11.1478	12.2528	12.6179	10.783	11.4846	9.85938
13.516	12.7644	10.4621	8.78999	12.9637	13.2385	11.1807
13.7924	12.4931	11.7951	9.94698	12.7641	12.1078	10.1303
13.1598	10.1652	9.88302	12.4017	11.0183	10.4885	10.233
13.64	13.3524	9.22759	10.173	12.24	10.6024	10.5295
14.1664	13.8397	10.2826	11.0923	12.785	11.0702	10.3257
12.4292	13.3176	9.33496	12.747	11.7191	11.0629	11.1935
11.9303	12.2788	10.6947	10.2028	13.5559	11.0288	10.9423
14.2714	11.9202	10.7768	10.3981	13.0327	9.84	9.41829
13.23	14.0478	11.4586	12.0109	13.5924	10.7501	9.18302
13.5249	13.7098	12.1865	11.2671	12.4315	10.7858	9.88186
12.4509	12.935	12.173	12.3811	13.1489	11.4764	9.93496
13.6606	12.9613	10.9629	11.6419	13.0838	10.9582	10.7485
13.1648	11.4617	11.5485	10.9613	12.2637	11.6346	10.6206
13.2106	14.3873	11.6257	10.4299	12.683	11.5307	11.0311
12.6474	12.9675	12.2699	11.1834	12.1927	10.085	8.98844
12.7966	14.3501	12.8172	9.52604	12.4478	10.721	9.99465
12.0718	13.7645	12.1954	9.36364	11.9009	10.5908	10.4381
