# Supplementary material for: Functional exploration of heterotrimeric kinesin-II in IFT and ciliary length control in Chlamydomonas
Source: eLife journal article supplement (doi:10.7554/elife.58868), 2020-10-28
Supplement: supp [file Figure 3A statistical data.xlsx]

## Sheet: Figure 3A
Velocities (mm/s)
fla8::FLA8-YFP-7#	fla8::FLA8-YFP-2-3#	fla8::FLA8-YFP-2-4#	fla8::KIF3B'-YFP-63#	fla8::KIF3B'-YFP-DBY1#	fla8::KIF3B'-YFP-RY1#	fla8::KIF3B'-YFP-RY5#
2.19989	2.68882	2.40008	0.758534	0.962418	0.838248	0.99006
2.19989	2.68882	2.93337	1.0268	0.834402	0.776363	1.0268
3.29986	2.68882	2.93337	0.942826	0.824961	1.04221	0.578913
2.93337	2.56667	2.68882	0.77007	0.879864	0.91659	0.733367
3.08008	2.19989	2.82862	0.814821	1.17351	0.824961	0.977813
3.08008	2.51418	2.44435	0.942826	0.91659	1.01526	0.824961
3.08008	2.19989	1.57158	0.879864	0.77007	0.91659	0.810625
2.93337	2.64015	2.19989	0.824961	0.962418	0.999858	0.930932
3.08008	2.64015	1.71109	0.905746	1.09997	0.776363	1.00826
2.47483	2.56667	2.51418	0.905746	0.879864	0.879864	0.758534
2.44435	2.47483	2.82862	0.879864	0.785802	0.942826	0.930932
2.47483	2.64015	2.41991	0.77007	0.962418	0.99006	0.933381
2.93337	2.74997	2.61246	0.879864	0.99006	1.09997	0.879864
3.143	2.72792	2.38344	0.879864	1.09997	0.942826	0.776363
2.47483	3.08008	2.64015	0.824961	1.29404	1.09997	0.905746
2.64015	3.17771	2.64015	0.810625	1.0268	1.05201	0.999858
2.74997	3.02507	2.74997	0.926384	1.09997	1.04221	1.0268
2.56667	2.64015	2.82862	0.785802	1.09997	0.879864	0.800136
3.08008	2.64015	2.60003	1.01526	1.04746	0.855383	0.942826
2.19989	2.47483	2.51418	1.05201	0.711696	0.855383	0.942826
2.41991	3.143	3.02507	0.879864	0.879864	0.694571	1.0268
2.56667	2.44435	2.98581	0.879864	0.824961	0.942826	1.09997
3.08008	2.93337	2.34663	0.905746	1.25724	0.896302	1.09997
2.47483	2.41991	1.96842	0.76168	1.09997	0.800136	0.846291
2.68882	2.70766	2.47483	1.09997	0.800136	0.824961	0.810625
2.51418	2.82862	2.64015	0.879864	0.91659	0.962418	0.977813
3.02507	2.74997	2.60003	0.90015	0.91659	0.999858	1.09997
2.68882	2.51418	2.40008	0.905746	0.800136	1.05586	0.659974
2.82862	2.19989	2.19989	1.09997	1.18472	0.977813	0.905746
2.51418	3.00008	2.68882	0.824961	0.962418	1.0352	0.800136
2.82862	2.60003	2.68882	0.91659	0.999858	0.942826	0.733367
2.44435	2.74997	2.82862	0.733367	1.01526	1.04221	0.694571
2.74997	2.93337	2.82862	0.846291	1.0268	0.926384	0.879864
2.82862	2.82862	2.98581	0.785802	0.942826	0.76168	0.905746
2.51418	2.93337	2.41991	0.785802	1.09997	0.942826	0.846291
3.02507	2.64015	2.74997	0.879864	0.905746	1.0352	0.810625
2.19989	2.19989	2.64015	0.879864	0.824961	0.999858	0.879864
2.19989	2.68882	2.64015	0.682689	0.733367	0.91659	0.864126
2.19989	2.85996	2.98581	0.905746	0.999858	0.905746	0.879864
2.87706	2.51418	2.88739	1.04746	0.733367	1.01526	1.14794
3.02507	2.80014	2.93337	0.962418	0.647045	1.0268	0.733367
2.64015	2.56667	2.80014	0.846291	0.733367	1.0352	1.04221
2.68882	2.47483	2.68882	0.977813	0.687581	0.962418	1.01526
2.51418	2.64015	2.74997	0.962418	0.733367	0.733367	0.962418
2.56667	2.80014	3.00008	0.942826	0.776363	1.0268	0.99006
1.75997	2.93337	2.51418	1.0268	0.962418	0.879864	0.733367
1.86168	2.82862	2.68882	1.0268	1.01526	0.838248	0.962418
1.95573	2.19989	2.93337	0.999858	0.733367	0.838248	0.942826
2.19989	2.51418	2.74997	0.800136	0.855383	0.90015	1.09997
1.71109	2.41991	2.41991	1.09997	0.77007	1.05586	1.09997
1.95573	2.19989	2.80014	1.00826	0.879864	0.879864	0.977813
	2.68882	2.74997	1.16475	0.700163	0.855383	0.977813
	2.19989	2.82862	1.18472	0.765176	1.0352	1.0268
	2.51418	2.47483		1.15249	0.776363	0.99006
	2.44435	3.143		1.09997	0.977813	0.91659
	2.19989	2.93337		0.905746	0.942826	0.977813
	2.19989	2.51418		0.855383	0.810625	1.04746
	2.47483	2.93337		1.09997	0.838248	0.933381
	2.82862	2.41991		0.905746	0.977813	0.999858
	2.93337	2.85996		0.776363	0.905746	0.879864
	2.44435	2.47483
	2.19989	2.93337
	2.56667	1.86168
	2.41991	2.87706
	2.56667	2.36928
	2.74997	2.19989
	2.82862	2.19989
	2.19989	2.74997
		2.40008
		2.68882
		2.19989
