# Supplementary material for: Functional exploration of heterotrimeric kinesin-II in IFT and ciliary length control in Chlamydomonas
Source: eLife journal article supplement (doi:10.7554/elife.58868), 2020-10-28
Supplement: supp [file Figure 3A_Movie_legend.docx]

**Figure 3A Movie legends**

Time-lapse movies of FLA8-YFP or KIF3B’-YFP in *Chlamydomonas* cilia. FLA8-YFP or KIF3B’-YFP were expressed in *fla8* cells, respectively. Images were acquired at 20 fps, movies are played at the same speed. Bars, 2 m.
