# Supplementary material for: Functional exploration of heterotrimeric kinesin-II in IFT and ciliary length control in Chlamydomonas
Source: eLife journal article supplement (doi:10.7554/elife.58868), 2020-10-28
Supplement: supp [file Figure 3B_C_F statistical data.xlsx]

## Sheet: Figure 3B
Anterograde velocity of IFT46-YFP
control	fla8::FLA8	fla8::KIF3B'
2.19989	2.51418	0.846291
2.19989	2.74997	0.855383
2.41991	2.19989	0.733367
1.95573	2.00014	0.574022
1.88563	2.19989	0.846291
2.19989	2.19989	0.800136
1.92508	2.51418	0.669409
1.98005	2.74997	0.77007
2.19989	2.19989	0.733367
2.19989	2.74997	0.785802
2.19989	1.98005	0.659974
2.19989	2.41991	0.810625
2.51418	2.68882	0.824961
2.44435	2.56667	0.77007
2.00014	2.19989	0.926384
2.44435	2.41991	0.860979
2.19989	2.19989	0.926384
2.19989	1.95573	0.896302
1.95573	1.75997	0.800136
2.19989	2.19989	0.733367
2.19989	2.19989	0.785802
2.19989	2.47483	0.824961
2.19989	2.19989	0.765176
2.38344	2.56667	0.76168
1.80008	2.38344	0.792095
2.00014	2.19989	0.733367
2.05339	2.56667	0.864126
2.51418	1.88563	0.810625
1.98005	2.38344	0.704007
2.47483	1.98005	0.77007
2.41991	2.19989	0.824961
2.47483	2.19989	0.864126
2.47483	2.74997	0.810625
2.19989	2.19989	0.879864
2.56667	2.19989	0.800136
2.19989	2.38344	0.91659
2.19989	2.01672	0.926384
1.92508	2.53829	0.91659
2.51418	1.98005	0.879864
2.19989	2.19989	0.879864
2.19989	2.47483	0.905746
2.19989	1.83317	0.838248
2.19989	2.19989	0.814821
2.56667	2.19989	0.800136
2.19989	2.19989	0.687581
2.56667	2.19989	0.910293
1.98005	2.51418	0.758534
2.19989	2.56667	0.785802
2.19989	2.19989	0.838248
2.64015	2.56667	0.776363
2.19989	2.19989	0.860979
2.47483	2.56667	0.800136
2.19989	2.19989	0.922536
2.47483	2.47483	0.758534
2.19989	2.44435	0.700163
2.19989	2.19989	0.90015
2.51418	2.01672	0.77007
2.51418	2.19989	0.896302
2.47483	1.83317	0.800136
2.47483	2.04281	0.507651
2.19989	2.56667	0.733367

## Sheet: Figure 3C
IFT injection rate (au/s)
WT	FLA8/FLA10/KAP	KIF3B'/FLA10/KAP
65.8502	53.6792	20.7647
69.016	66.8695	24.1948
54.6585	72.5406	23.5276
53.728	50.3657	25.8808
60.2334	40.6148	22.8028
43.1916	39.4219	29.3115
36.5863	69.1265	22.4434
60.5803	56.7988	24.6333
50.8478	71.6016	32.3852
59.0868	63.6634	21.2537
63.8902	44.4494	18.5546
59.532	65.6242	18.4491
37.2205	56.1867	18.281
49.9535	59.9111	27.5426
37.3098	44.2398	18.2783
65.1085	60.924	26.7326
45.9372	65.2218	18.5702
55.7231	43.7492	21.7618
37.8085	49.2559	25.006
63.3655	45.8356	21.6074
67.0545	49.8738	32.261
70.5736	45.6527	20.6308
66.9115	39.6515	19.1525
66.6722	61.6723	23.3882
54.9178	58.4831	30.0557
69.3424	45.0717	33.9576
65.6337	42.9121	22.3788
60.5982	50.1625	23.281
54.7318	56.4411	35.586
51.0709	70.429	22.1219
		23.8361
		31.6902
		30.5173
		20.8211
		31.574
		18.9449
		20.2361
		22.7044

## Sheet: Figure 3F
IFT frequency (trains per second)
WT	FLA8/FLA10/KAP	KIF3B'/FLA10/KAP
0.269476	0.250114	0.340091
0.184966	0.158542	0.308428
0.209112	0.175171	0.286105
0.155353	0.243508	0.339863
0.375399	0.407973	0.237585
0.286105	0.338952	0.159453
0.298861	0.248519	0.347608
0.228246	0.313667	0.208884
0.240319	0.145102	0.283371
0.312528	0.148291	0.231891
0.194533	0.188383	0.247153
0.130068	0.253758	0.285421
0.175399	0.353075	0.357631
0.30615	0.238724	0.241913
0.202278	0.282004	0.177904
0.159681	0.154442	0.156264
0.215945	0.121868	0.343963
0.186788	0.25262	0.26492
0.232574	0.200228	0.269476
0.235535	0.196128	0.314578
0.22574	0.248975	0.250797
0.212756	0.2959	0.187927
0.210934	0.196811	0.199544
0.171298	0.132118	0.259225
0.238724	0.266743	0.233485
0.209112	0.232346	0.143508
0.31025	0.294989	0.158542
0.199772	0.253075	0.259453
0.281777	0.182916	0.0938496
0.368109	0.285649	0.245786
0.382005	0.305922	0.216629
0.33508	0.323462	0.378588
0.202506	0.240547	0.234396
0.239408	0.24328	0.190888
0.274715	0.245103	0.25877
0.193622	0.306378	0.214351
0.204784	0.235308	0.248291
0.275626	0.304556	0.196583
0.337813	0.209567	0.468109
0.224829	0.283599	0.24943
0.235991	0.127107	0.200456
0.228929	0.32574	0.351481
0.167426	0.292563	0.183143
0.18041	0.290193	0.279043
0.15877	0.238577	0.327563
0.338041	0.265663	0.287699
0.228702	0.26156	0.154214
0.234169
0.213667
0.237585
0.25672
0.208884
0.221185
0.278588
0.172437
0.360137
0.257859
0.28246
0.355353
0.274032
