# Supplementary material for: Functional exploration of heterotrimeric kinesin-II in IFT and ciliary length control in Chlamydomonas
Source: eLife journal article supplement (doi:10.7554/elife.58868), 2020-10-28
Supplement: supp [file Figure 3B_C_F_Movie_legend.docx]

**Figure 3B_C_F Movie legends**

Time-lapse movies of IFT46-YFP of *Chlamydomonas* cilia of control cells, *fla8* cells expressing FLA8 or KIF3B’ or KIF3B’-YFP. Images were acquired at 20 fps, movies are played at the same speed. Bars, 2 m. The data for anterograde velocity, IFT injection rate and IFT frequency are presented in Figure 3B, C and F, respectively.
