# Supplementary material for: Functional exploration of heterotrimeric kinesin-II in IFT and ciliary length control in Chlamydomonas
Source: eLife journal article supplement (doi:10.7554/elife.58868), 2020-10-28
Supplement: supp [file Figure 4C statistical data.xlsx]

## Sheet: Figure 4C
Ciliary length (mm) during cilia assembly at different times after pH shock
WT								FLA8/FLA10/KAP								KIF3B'/FLA10/KAP
-5		15	30	60	90	120	180	-5	0	15	30	60	90	120	180	-5	0	15	30	60	90	120	180
10.495	0	3.16359	7.20393	10.1187	11.4264	11.19	9.93496	11.5485	0	4.4198	5.01051	9.5086	11.2687	13.5001	11.1245	9.73147	0	2.80467	6.65199	7.62409	8.9303	8.94813	8.34038
11.6815	0	4.38531	6.31207	9.99	10.6156	11.933	11.9249	11.7656	0	5.85547	7.24037	8.821	10.609	11.4555	13.0338	8.35045	0	3.1008	7.15975	9.5931	9.89271	9.83419	9.90085
9.81985	0	4.45818	5.84423	9.67566	9.57915	12.7683	11.7734	11.242	0	4.69267	8.25549	9.57566	10.5295	10.3536	12.0168	9.69155	0	2.73801	7.8834	6.78843	10.3423	9.72101	9.72101
11.1373	0	3.10855	7.53494	9.78535	10.7733	10.745	12.1993	11.1156	0	4.00197	6.83494	9.27837	8.95744	11.0637	10.1761	9.74155	0	3.28375	6.38455	6.88533	9.74504	9.88768	9.46364
12.9916	0	2.74072	7.05199	7.31401	12.4757	10.1857	11.9296	9.78264	0	5.2733	9.20356	8.77449	10.6144	12.8811	12.4815	10.5978	0	2.79498	7.28959	10.4419	10.6113	10.2753	9.72101
9.7993	0	3.57367	7.80975	8.9148	9.27449	11.2404	13.2532	11.7451	0	3.66166	7.98882	9.62527	11.4377	10.0226	12.7633	9.29271	0	3.75507	5.3609	6.80238	9.7055	7.88223	10.1792
10.6528	0	5.195	5.38454	7.14928	11.4214	9.62256	11.7373	12.6063	0	4.6326	6.25005	10.1865	9.25124	10.6381	10.5156	8.80317	0	2.79498	5.11554	6.90975	10.5474	9.96287	10.1074
11.7958	0	3.876	7.59308	7.48804	9.83574	11.7985	12.3815	11.5094	0	3.16359	9.19193	9.64039	11.3989	10.1737	10.9148	8.60356	0	3.28879	5.9702	9.06286	9.81636	7.34502	9.69775
11.5621	0	3.34305	9.00899	9.86868	10.1323	12.2396	10.6761	10.8679	0	5.17252	8.17642	9.57294	10.483	10.5807	9.33457	9.79853	0	4.19693	6.33183	8.80782	8.56945	8.2179	10.5512
11.6478	0	4.10934	8.38185	10.9276	11.7598	12.0443	11.435	11.3323	0	3.4229	8.4958	8.90085	10.6993	11.2726	12.8989	9.39077	0	3.876	4.62407	8.01208	8.94697	8.09696	10.3792
11.3966	0	3.82057	6.21362	10.7602	8.74464	11.3807	12.0098	12.2912	0	3.04188	8.26247	9.42527	11.9699	11.8974	10.9284	9.94775	0	2.6946	8.67488	9.20705	9.78884	9.3024	11.0206
11.7575	0	3.90817	9.18883	9.90589	10.3997	11.9772	11.8164	11.909	0	2.79498	6.60044	8.45588	11.9602	11.2264	12.1358	9.37217	0	1.938	5.91633	6.57292	9.94039	8.60743	9.65357
11.2357	0	4.24189	6.5578	11.0005	9.94039	11.6958	12.7237	12.873	0	3.22444	8.24115	11.2993	12.2276	10.6768	11.654	9.19193	0	2.45157	6.71091	7.49153	10.2478	8.32836	10.783
12.09	0	3.13103	8.13882	9.73147	10.0857	8.32371	11.6171	12.3179	0	5.84617	8.152	9.66713	10.7912	12.4245	12.3137	9.14775	0	3.65662	6.60315	8.25704	9.95241	9.78768	9.90977
10.9102	0	3.33569	8.49968	7.52254	10.9078	12.0528	11.3493	11.3423	0	2.2601	6.28726	8.82449	10.4652	11.266	12.6528	8.54077	0	3.33569	7.45549	7.88572	9.34116	7.54735	8.50007
11.6947	0	3.95778	6.68106	12.2183	10.6854	11.7598	14.0738	10.7706	0	5.0388	8.77526	12.8148	12.0381	12.6563	11.0737	8.38495	0	2.98762	5.54966	7.76595	8.38069	9.74349	9.47101
12.0749	0	3.89538	6.71866	9.72178	11.5544	10.9555	12.7424	12.623	0	3.89538	6.3954	9.46248	10.3268	12.0749	11.6373	8.01479	0	0.7752	5.88377	7.05665	9.5307	10.759	9.6086
12.5358	0	3.69034	7.28921	7.82371	10.0726	11.4245	12.7129	12.4985	0	3.76282	6.73145	8.37294	9.81791	11.3311	12.3121	8.67449	0	3.16359	5.24268	9.92682	10.3629	9.62798	10.7493
11.2951	0	3.93879	9.7714	11.0059	10.5439	12.5338	12.1342	9.81481	0	3.50972	6.59773	9.35589	11.8078	10.0764	10.1733	7.84812	0	2.35777	3.28375	6.04152	8.84387	9.21325	9.5338
12.4094	0	4.64771	7.34269	5.86555	10.7799	12.3082	11.9625	8.1396	0	2.6477	7.49037	10.6443	10.8276	12.1734	11.5098	10.5559	0	3.53607	4.41283	7.03688	8.44425	9.6745	10.0776
12.5571	0	3.19499	6.51478	8.39735	10.7191	11.5257	12.2629	11.8164	0	4.25003	7.73998	9.62605	11.3555	11.8245	12.6493	12.178	0	2.82367	4.17368	6.92525	10.1016	8.19425	9.54039
13.192	0	4.32639	6.7768	9.02294	11.302	11.7032	12.0389	12.7675	0	4.31127	8.48766	8.94852	10.3602	10.8528	12.2327	10.5137	0	3.37793	4.04964	7.97332	9.60046	11.9237	10.2807
11.6788	0	4.10662	7.48572	9.57062	10.5439	10.7427	12.8028	11.2524	0	4.0636	7.45859	9.62101	11.8648	9.42604	10.8571	10.1838	0	2.7132	5.9295	6.45819	10.4784	8.37177	9.0648
12.3024	0	4.04654	6.35703	11.283	11.4509	11.7885	10.8861	10.4939	0	3.95274	8.0927	9.25395	9.70085	10.404	10.4652	8.62255	0	2.4818	4.35159	9.0617	7.70936	10.2059	10.5357
12.1187	0	4.35507	7.133	10.5811	11.2555	11.821	11.79	12.4203	0	4.6512	8.04503	8.5272	11.1668	10.4865	10.0516	8.19464	0	2.7132	4.71554	7.21479	8.93069	8.93108	9.91209
13.1489	0	5.08647	7.05471	8.36712	11.7001	12.5284	11.052	11.3202	0	3.18375	7.29114	7.85549	11.2509	10.8888	9.69	10.1578	0	3.53607	6.62331	8.71325	8.59077	9.41868	10.9609
11.3005	0	3.89732	7.48456	7.55471	11.1396	10.6431	11.4055	12.4873	0	4.49849	8.11208	9.71171	9.94388	10.1528	12.2509	9.00627	0	3.48491	4.37407	9.63961	8.50549	8.75046	9.12759
12.197	0	4.00197	6.73261	10.6799	10.6745	10.9606	11.2733	11.34	0	4.10934	8.37449	9.2117	10.6067	11.0175	11.0292	9.29891	0	2.35777	5.01051	7.55781	9.55085	8.48495	9.9931
11.9296	0	4.41438	6.50121	7.80704	11.8148	12.4858	12.6288	10.9369	0	4.67872	7.78185	9.03883	11.3745	9.83225	11.9036	10.1815	0	3.12483	4.04654	8.01867	9.91597	8.27138	8.51131
12.0536	0	3.57367	7.82177	11.0183	10.9319	11.2671	11.2931	10.5385	0	3.89538	8.33418	10.2947	11.342	11.4113	11.2679	9.43884	0	2.74072	4.33414	8.94503	9.08883	8.83883	8.76596
13.4924	0	4.29383	6.73843	10.0431	9.08379	12.5811	13.1683	12.5997	0	3.53607	7.86053	10.2989	11.0885	10.6493	11.4009	8.53611	0	2.35777	4.7419	7.752	9.50977	9.00201	9.21325
12.2571	0	4.04422	7.80975	7.58572	10.1993	11.7668	11.5908	9.38341	0	3.12483	8.3772	9.55356	11.8307	11.1513	11.2183	11.859	0	3.12483	3.65778	8.88728	9.68612	9.65124	9.31442
12.2466	0	3.50972	6.12834	10.6419	10.9071	11.5695	12.5117	13.0749	0	3.35623	7.59541	11.1544	11.2823	10.5485	10.6509	10.2512	0	2.56049	5.35159	9.26403	10.4063	9.40938	10.3427
12.792	0	3.14847	6.76672	10.5551	9.33883	11.9757	12.6706	11.2664	0	4.46631	7.73805	10.0152	9.60628	10.2962	12.4734	8.26557	0	2.2601	4.19267	8.83961	10.8222	8.93418	7.42874
11.2338	0	4.0636	8.21479	9.57566	12.4152	12.885	11.0063	11.5939	0	3.86243	8.2489	10.2474	9.51907	11.2024	11.192	9.04155	0	3.02716	5.86167	7.50394	9.21325	9.84659	9.72837
11.828	0	4.86438	7.14114	8.82798	10.7807	11.5749	11.2544	12.0939	0	5.16012	7.6644	7.86944	10.695	12.4094	11.4702	9.50201	0	3.69654	6.15276	8.85007	8.08146	8.46015	9.47101
11.8086	0	6.11865	8.09464	9.38883	11.254	12.7234	10.8241	9.92721	0	4.88609	6.26168	10.885	11.6466	13.7079	11.6768	11.0323	0	2.90584	7.18572	7.3644	9.41597	10.3768	6.9923
12.1598	0	4.05895	7.88185	9.90512	10.1086	10.8214	11.3233	12.242	0	3.876	6.5892	9.36907	11.3768	12.002	12.1218	9.9183	0	3.39848	6.36594	8.12061	8.52371	8.38185	7.95239
12.4009	0	2.82173	7.01982	9.29271	12.609	12.9439	11.4396	10.1962	0	4.54616	6.87137	9.70512	10.6509	10.1943	11.978	8.36867	0	1.938	5.83687	7.98495	8.4958	10.3257	8.09348
12.3296	0	4.01786	8.55549	9.63884	10.9551	11.5272	11.7772	10.0888	0	3.89538	8.00549	8.79813	12.5125	13.1594	11.883	11.5966	0	3.18375	5.05353	7.66091	9.50318	9.8462	8.15162
11.9718	0	4.92446	6.08222	8.91945	11.1024	10.5981	10.8094	10.9272	0	3.89538	7.40626	8.76519	9.36907	12.1656	11.6392	9.89078	0	2.35777	6.46401	7.55665	8.11596	10.2458	10.1447
12.8854	0	4.71399	7.74425	8.58185	10.2431	12.5311	12.4342	9.43884	0	4.39306	5.93144	8.95162	10.6195	10.9578	11.3958	8.0958	0	1.59807	4.61787	8.77526	8.50084	10.9625	10.8009
11.0191	0	4.44926	3.57445	11.3613	9.92372	11.6726	10.9885	11.0559	0	4.1981	6.51904	9.61442	10.3954	11.183	12.8315	9.1648	0	2.3256	7.46208	6.56323	8.15045	10.4385	9.06403
13.171	0	4.62949	6.26749	9.60589	10.7702	12.3745	12.0346	13.2722	0	4.04964	4.56128	9.52915	10.0776	10.4307	11.2873	9.36674	0	3.51592	7.13804	7.70471	7.57254	10.5439	11.1028
12.6354	0	3.53607	8.45239	9.00162	11.4733	11.2214	14.9695	11.7819	0	3.5477	8.10472	9.63457	12.1927	12.6501	11.0175	10.3892	0	2.74072	6.69346	7.07292	8.20123	10.4939	8.9148
12.0377	0	5.4264	6.69967	9.59077	12.8869	12.0625	11.7606	12.192	0	3.42948	7.13649	8.34503	9.88147	11.9222	11.3292	11.2629	0	2.7132	4.66748	7.48882	7.09114	9.9621	8.82371
12.1578	0	4.83415	8.27914	9.59698	12.7443	10.9249	10.6857	11.1183	0	4.73298	5.66981	11.552	10.4292	12.2885	11.302	9.00007	0	2.84305	6.30974	8.0989	8.53611	8.92333	8.99038
12.8823	0	3.81708	5.45392	9.53767	13.2393	11.3877	11.5133	12.6079	0	4.74655	7.07409	11.242	11.2679	11.8784	11.0357	10.8373	0	4.07484	7.22525	5.84617	8.0303	9.90085	8.56363
12.4063	0	3.92019	6.83184	10.2931	11.5067	14.0052	11.44	12.7117	0	4.0636	6.57796	10.0803	10.5768	10.4346	11.7989	8.60743	0	2.35777	6.4047	6.76905	8.21324	11.271	8.85278
12.7513	0	4.33337	7.16595	9.30899	9.88458	10.8361	12.9714	10.5617	0	3.66166	5.59811	11.0528	10.6625	12.9299	11.09	10.8164	0	1.97637	5.98261	9.77178	9.58767	10.709	8.11131
