# Supplementary material for: Functional exploration of heterotrimeric kinesin-II in IFT and ciliary length control in Chlamydomonas
Source: eLife journal article supplement (doi:10.7554/elife.58868), 2020-10-28
Supplement: supp [file Figure 4F statistical data.xlsx]

## Sheet: Figure 4F
IFT injection rate (au/s)
FLA8/FLA10		KIF3B'/FLA10
length	Injection rate	length	Injection rate
3.491	88.4784	3.055	72.3757		3~5
3.85	74.5565	3.089	76.1034		5~7
3.911	153.878	3.101	64.0002		7~9
4.03	122.449	3.428	62.1205		9~11
4.289	145.654	3.713	54.6319		11~13
4.307	124.584	3.931	57.6044
4.314	146.859	3.96	91.6706
4.373	126.303	4.045	53.8431
4.448	147.939	4.073	49.0098
4.475	121.047	4.113	58.65
4.485	120.748	4.329	54.3841
4.508	146.042	4.351	73.448
4.596	108.712	4.565	62.2835
4.866	142.131	4.735	60.0802
5.005	130.724	4.799	52.3095
5.24	94.9093	4.818	55.1058
5.299	107.668	4.841	46.6969
5.447	111.108	4.974	63.7889
5.526	77.3312	5.128	49.2226
5.75	110.5	5.217	46.387
5.765	129.092	5.267	57.4115
5.925	142.638	5.283	57.0183
5.928	143.407	5.356	46.2277
5.949	86.8394	5.454	64.1711
5.972	124.221	5.465	63.5169
6.015	113.199	5.534	39.3574
6.109	108.415	5.549	48.562
6.149	94.0978	5.584	67.9694
6.154	144.377	5.64	47.047
6.176	113.823	5.661	64.2461
6.293	146.05	5.7	45.989
6.306	129.953	5.77	60.0355
6.327	112.106	5.99	57.2692
6.363	77.4846	6	48.9613
6.367	96.5279	6.013	69.5114
6.496	120.595	6.059	66.5318
6.497	110.371	6.166	37.6609
6.499	116.909	6.19	54.8029
6.51	117.753	6.437	39.482
6.555	93.3435	6.481	50.0358
6.56	86.464	6.498	38.3234
6.735	157.455	6.511	45.9787
6.852	120.284	6.646	32.6812
6.87	89.8189	6.71	48.4166
6.88	113.946	6.764	46.5849
7.035	111.059	6.828	31.349
7.12	119.899	6.952	66.7247
7.126	95.3874	7.008	25.6486
7.35	125.114	7.035	43.6506
7.45	111.386	7.038	38.0603
7.475	98.8805	7.073	43.6937
7.694	112.782	7.107	61.791
7.753	81.9547	7.183	52.2378
7.789	122.838	7.191	55.4701
7.789	122.838	7.223	37.3987
7.833	69.2819	7.261	31.4679
7.878	87.0252	7.302	51.1631
7.891	80.2675	7.343	30.9337
8.172	137.254	7.377	37.9683
8.202	108.857	7.38	31.0911
8.407	68.3068	7.409	38.6787
8.503	91.9895	7.449	42.6058
8.584	132.122	7.516	39.2002
8.596	66.1982	7.563	29.0316
8.631	83.7573	7.591	56.6213
8.669	137.591	7.602	44.3359
8.735	112.956	7.628	55.0035
8.771	98.9276	7.688	40.8666
8.779	118.625	7.791	42.0754
8.806	79.8541	7.863	41.206
8.852	102.334	7.968	44.1407
8.893	76.9234	7.989	30.399
8.947	35.4529	8.114	45.4409
8.982	132.303	8.215	61.2049
9.048	84.5732	8.265	37.8092
9.076	96.8903	8.33	42.671
9.094	67.6983	8.439	37.746
9.118	63.1455	8.524	54.2446
9.136	67.306	8.56	41.0827
9.167	97.1874	8.658	60.5405
9.171	86.3637	8.724	45.0419
9.295	141.665	8.831	31.8511
9.406	115.848	8.934	42.387
9.457	117.048	8.942	43.4492
9.789	101.47	8.959	28.0087
9.862	141.683	9.1	30.3325
9.958	74.2206	9.142	34.1602
9.98	65.9838	9.282	53.8117
9.988	65.3243	9.651	35.1671
10.004	60.578	10.114	48.006
10.166	64.5705	10.194	40.6113
10.174	97.859	10.206	26.9042
10.174	85.6067	10.235	29.4748
10.348	66.9534	10.243	27.397
10.429	74.2057	10.286	27.741
10.603	71.4816	10.497	26.8327
10.677	68.755	10.784	38.4816
10.769	118.39	10.791	40.5688
10.972	102.926	10.954	39.9132
11.013	116.188	10.986	33.728
11.03	65.8643
11.229	53.1835
11.452	60.0084
11.612	88.5422
11.63	101.039
11.668	57.5826
11.835	76.1015
11.932	70.8832
12.042	63.7984
12.216	77.26
12.286	74.1554
12.442	78.7522
12.551	79.077
