# Supplementary material for: Functional exploration of heterotrimeric kinesin-II in IFT and ciliary length control in Chlamydomonas
Source: eLife journal article supplement (doi:10.7554/elife.58868), 2020-10-28
Supplement: supp [file Figure1E_Movie_legend.docx]

**Figure 1E Movie legends**

Time-lapse movies of IFT46-YFP in flagella of *Chlamydomonas* cells expressing wild-type CrKinesin-II and chimeric CrKinesin-II. Images were acquired at 20 fps and movies are played at the same speed. Bars, 2 m.
