# Supplementary material for: Functional exploration of heterotrimeric kinesin-II in IFT and ciliary length control in Chlamydomonas
Source: eLife journal article supplement (doi:10.7554/elife.58868), 2020-10-28
Supplement: supp [file Figure2B_Movie_legend.docx]

**Figure 2B Movie legends**

Time-lapse movies of the motors as indicated moving on microtubules *in vitro*. Images were acquired at 12.3 fps and the movies are played at the same speed. Bars, 2 m.
